# Supplementary material
Source: PubMed Central journal article supplement (PMC4475879)
Supplement: AEM.00046-15_zam999116369so1.pdf [file AEM.00046-15_zam999116369so1.pdf]

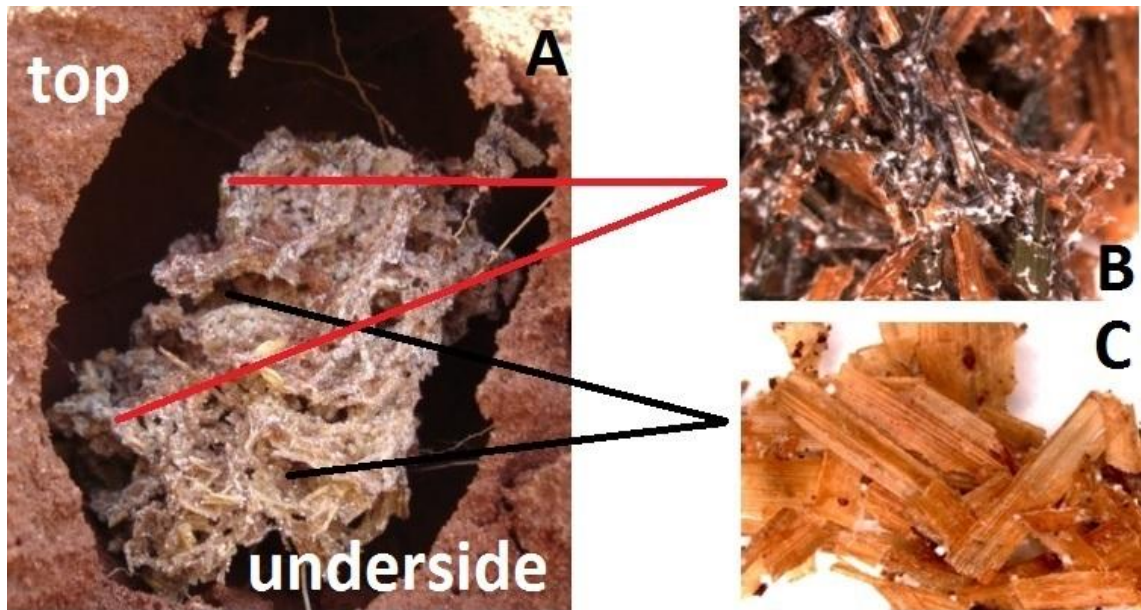

**FIG S1** *A. bisphaerica* field nest with the first chamber opened and exposing the fungus garden (A). Note the top and the underside parts of the nest chamber, the white spots of *L. gongylophorus* on fungus garden peripheral sector which circumvents the entire fungus garden structure, and the core sector with a few number of *L. gongylophorus* clusters. Samples containing green plant fragments collected from the peripheral sector (B) or pale yellow plant fragments collected from the core sector (C) are also shown.

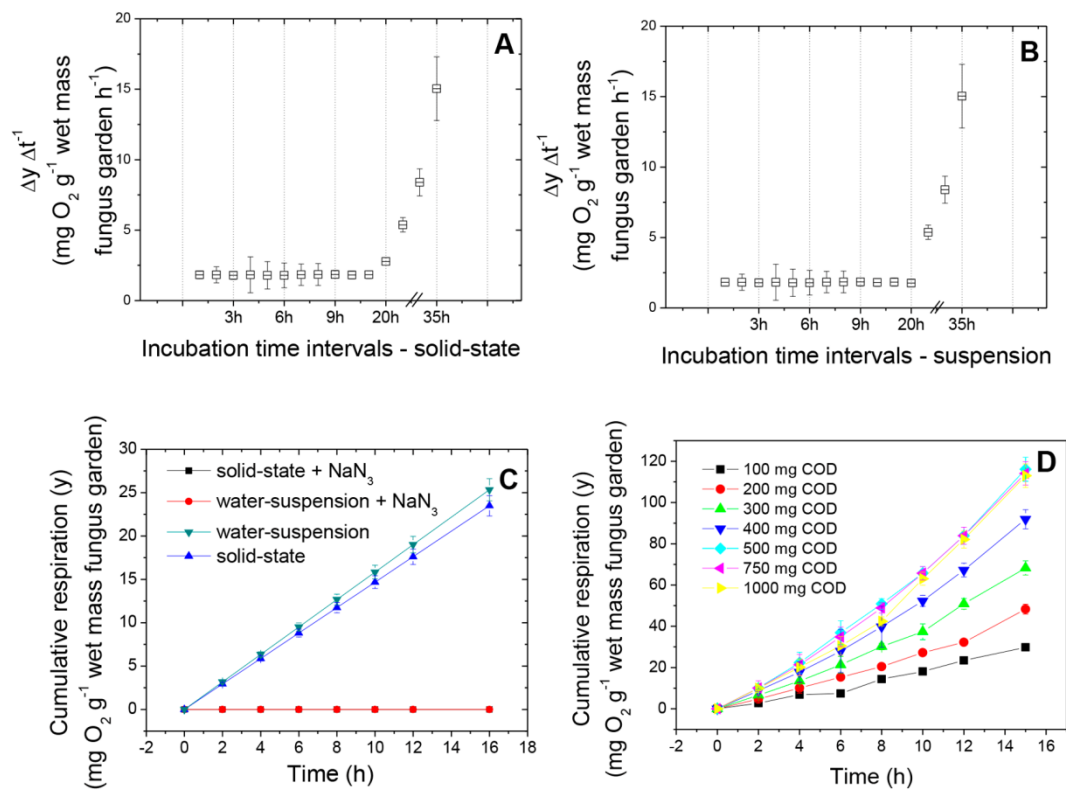

**FIG. S2**

**FIG S2** Respiration of whole ant-free fungus garden material. A - Respiration stability of solid state fungus garden. B- Respiration stability of fungus garden suspension. C - Effect of sodium azide on respiration. D- Acetate-induced respiration.

**Table S1.** Variation in mass and fiber glucose after incubation of ant-free whole fungus garden material.

| Incubation (h) | Residual Material (mg)     | Filtrate (mg)               | Glucose in fiber (mg [%])      |
|----------------|----------------------------|-----------------------------|--------------------------------|
| 0              | 81.34 (11.32) <sup>a</sup> | 122.18 (15.67) <sup>a</sup> | 19.41 (7.23) <sup>a</sup> [24] |
| 10             | 10.14 (4.39) <sup>b</sup>  | 178.41 (10.14) <sup>b</sup> | 9.23 (2.12) <sup>b</sup> [91]  |
| $\Delta$       | - 70.94 (15.71)            | 58.23 (25.81)               | 9.62 (8.67)                    |

Data represent the mean (SD) obtained from samples (548,65±8,68 mg; wet mass) of fungus garden material from six different nests. Values followed by different letters were significantly distinct from each other according to the Mann-Whitney test at  $p \leq 0.05$  into columns.
